# Supplementary material for: Intracranial efficacy of alectinib in ALK-positive NSCLC patients with CNS metastases—a multicenter retrospective study
Source: Springer Nature journal article supplement (doi:10.1186/s12916-021-02207-x), 2022-01-18
Supplement: MOESM1 [file 20045054]

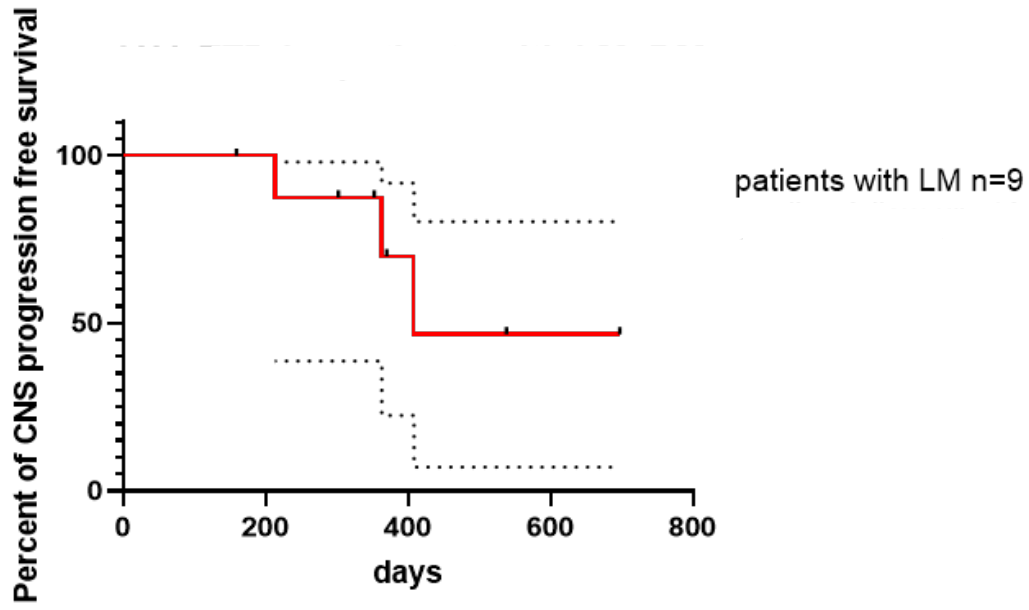

**FigS1: CNS TTP for patients with LM**

9 patients with LM, with median follow-up of 16.8 months, CNS TTP was 408d.

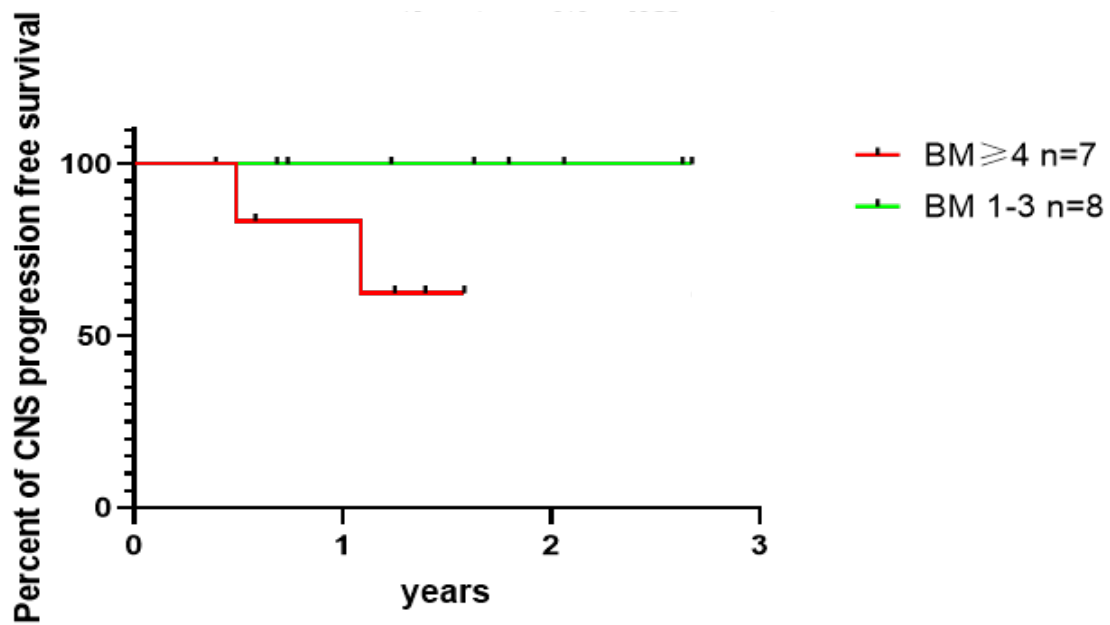

**FigS2a: CNS TTP for patients with BM 1-3 vs 4 in Cohort 1**

CNS TTP for patients with different number of BM in Cohort 1 was NE vs NE,  
 $p=0.0925$ , HR undefined.

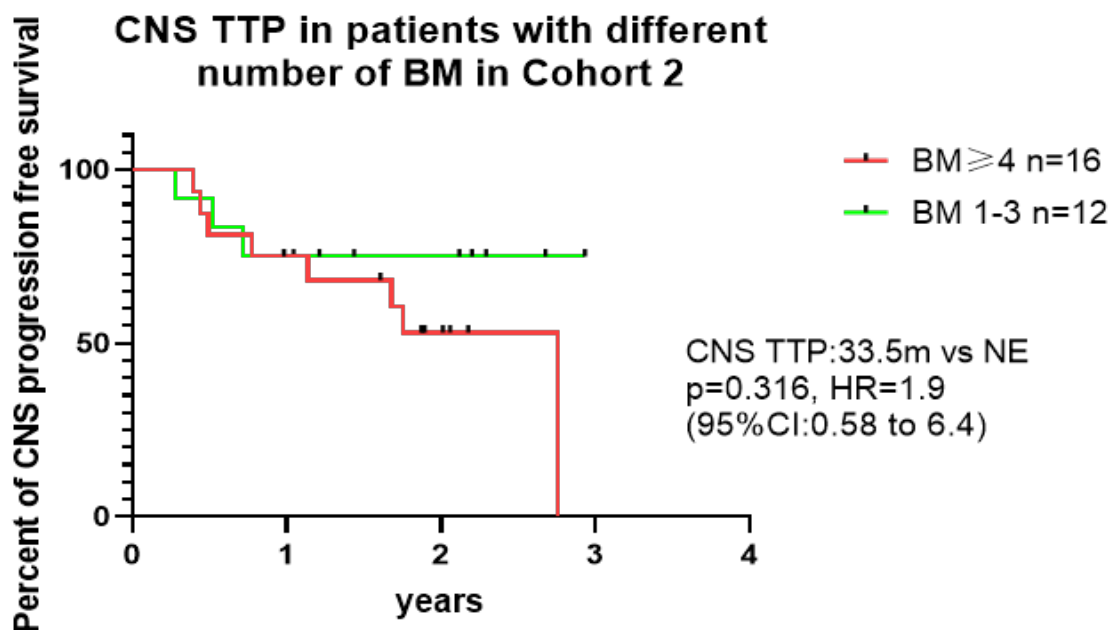

**FigS2a: CNS TTP for patients with BM 1-3 vs 4 in Cohort 2**

CNS TTP for patients with different number of BM in Cohort 2 was 33.5m vs NE,  
 $p=0.316$ , HR=1.9(95% CI: 0.58 to 6.4).

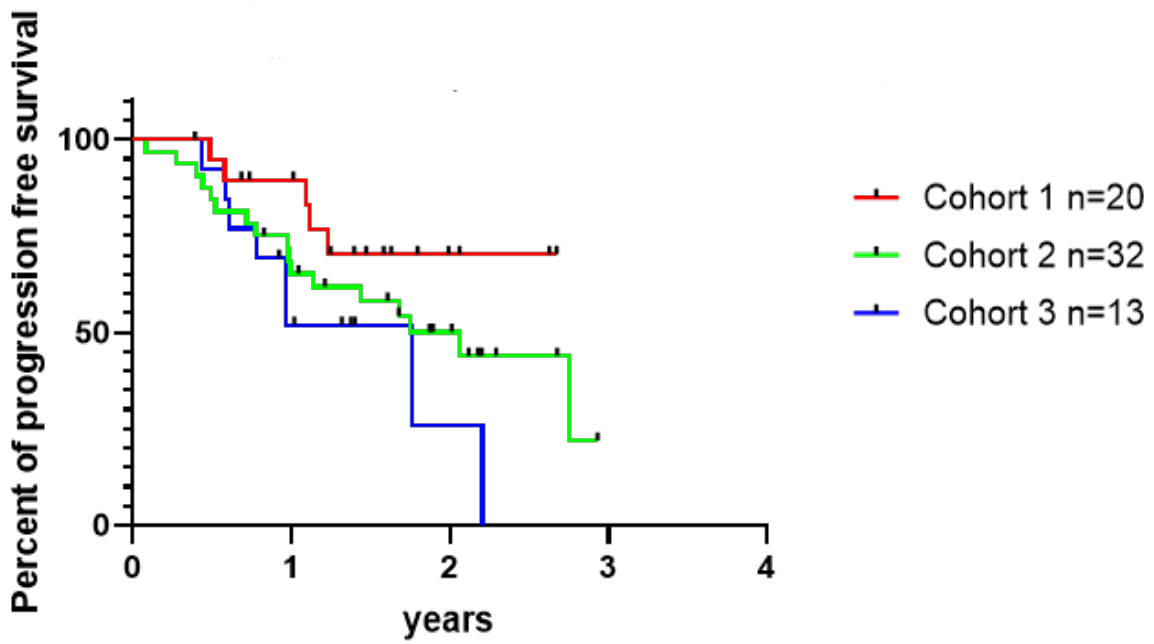

**FigS3a: progression free survival in three cohorts**

With median follow-up of 19.2 months, 22.5 months, 15.8 months in these three cohorts respectively, PFS was NE vs 24.7 months vs 21.2 months.

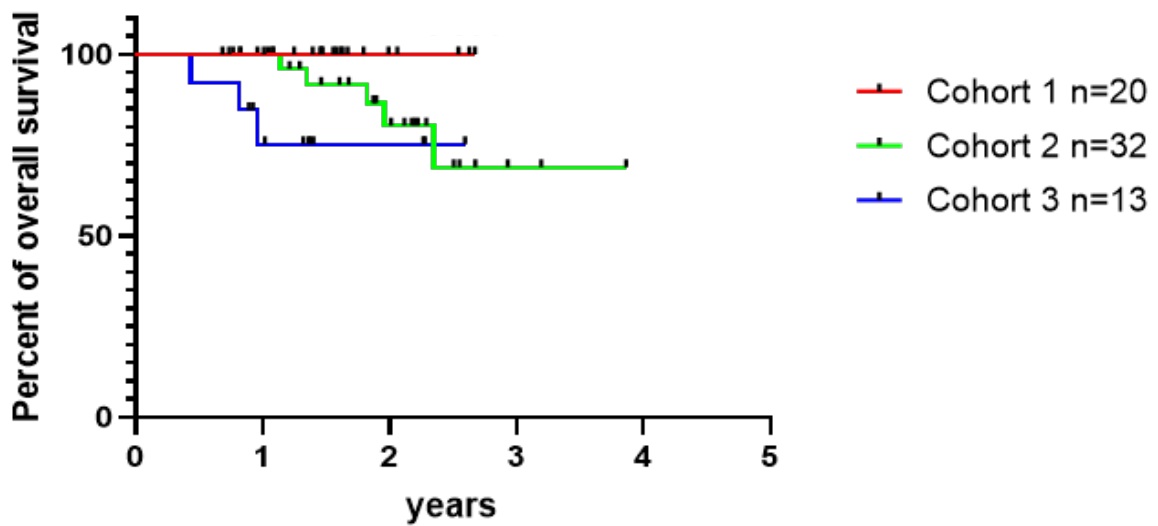

**FigS3b: overall survival in three cohorts**

With median follow-up of 19.2 months, 22.5 months, 15.8 months in these three cohorts respectively, OS was NE vs NE vs NE.
